# Supplementary material for: EP-pred: A Machine Learning Tool for Bioprospecting Promiscuous Ester Hydrolases
Source: Preprints.org preprint supplement (doi:10.20944/preprints202209.0100.v1), 2022-09-07
Supplement: Supplementary file 1 [file supplementary]

## Sheet: Table_S3 sitemap_descriptors
	hydrophobic	enclosure/exposure	enclosure	exposure	NCBI Reference Sequence
sid|12870	2.386	2.6164	0.989	0.378	PHR82761.1		The sequences were ordered based on the hydrophobic scores and enclosure/exposure scores as well.
sid|171015	1.58	1.78245	0.975	0.547	AMK51992.1		Those that had the top scores in both hydrophobic and enclosure/exposure were chosen to be tested
sid|171057	1.043	1.73118	0.966	0.558	WP_066160068.1
sid|171087	1.115	1.92203	0.986	0.513	ART35915.1
sid|171139	2.391	2.75487	0.989	0.359	WP_059541090.1
sid|171306	1.953	2.2814	0.981	0.43	WP_059536210.1
sid|171511	1.568	1.97955	0.968	0.489	WP_071333398.1
sid|171705	1.913	2.14597	0.985	0.459	WP_096500752.1
sid|172035	0.424	2.06526	0.981	0.475	WP_007152861.1
sid|172354	1.281	1.55008	0.975	0.629	WP_085043544.1
sid|172480	1.732	2.03942	0.983	0.482	WP_024774209.1
sid|172488	0.447	1.98783	0.98	0.493	PLY11543.1
sid|172548	1.236	2.0766	0.976	0.47	KXJ46484.1
sid|172751	0.664	1.91033	0.98	0.513	WP_059464931.1
sid|172893	1.911	2.40732	0.987	0.41	WP_038200842.1
sid|173223	1.826	1.91749	0.976	0.509	PKO84122.1
sid|173353	1.848	1.77518	0.987	0.556	ODU62785.1
sid|173606	1.218	1.875	0.975	0.52	WP_035489636.1
sid|174159	1.488	2.0352	0.983	0.483	WP_011803687.1
sid|174337	2.261	2.09766	0.988	0.471	BAH89650.1
sid|174531	2.261	2.09766	0.988	0.471	WP_047350376.1
sid|174539	1.664	1.79266	0.977	0.545	WP_020161852.1
sid|174843	1.44	1.85633	0.982	0.529	WP_014160661.1
sid|174901	0.172	1.53956	0.973	0.632	WP_096445991.1
sid|175027	2.187	2.4675	0.987	0.4	WP_083447098.1
sid|175180	2.841	2.03711	0.988	0.485	ART37310.1
sid|175537	1.629	2.22045	0.977	0.44	PCI66289.1
sid|175582	2.145	2.06356	0.974	0.472	WP_060040128.1
sid|175965	0.907	2.17035	0.981	0.452	WP_066266841.1
sid|176070	2.263	2.34606	0.983	0.419	WP_069226497.1
sid|176238	1.482	1.88588	0.975	0.517	WP_059509898.1
sid|176271	2.444	2.05462	0.978	0.476	WP_059685121.1
sid|176877	0.477	1.75401	0.984	0.561	WP_066786840.1
sid|177142	0.185	1.65882	0.987	0.595	WP_086926288.1
sid|177495	0.951	2.12095	0.982	0.463	WP_038710735.1
sid|178198	2.528	2.41626	0.981	0.406	AJP48854.1
sid|178810	1.841	2.23409	0.983	0.44	ART35835.1
sid|179581	2.032	1.74735	0.989	0.566	AAC03446.1
sid|179921	1.956	1.98182	0.981	0.495	OUR85636.1
sid|180124	0.901	1.87861	0.975	0.519	WP_019529171.1
sid|180273	2.546	2.7493	0.987	0.359	WP_014900537.1
sid|180409	0.371	1.93151	0.987	0.511	WP_099617941.1
sid|180953	1.042	2.14069	0.989	0.462	OEZ29108.1
sid|181002	2.15	2.09534	0.989	0.472	WP_073023515.1
sid|181104	2.417	2.33176	0.991	0.425	ART39858.1
sid|181137	1.5	2.01646	0.98	0.486	WP_044845453.1
sid|181382	1.674	1.962	0.981	0.5	WP_011516071.1
sid|181383	4.256	2.23982	0.99	0.442	WP_055422979.1
sid|181416	2.692	2.88824	0.982	0.34	WP_101198885.1
sid|181580	0.698	1.55433	0.987	0.635	WP_058698698.1
sid|181817	0.579	1.88952	0.992	0.525	WP_068636205.1
sid|182205	1.722	2.38443	0.98	0.411	WP_007231652.1
sid|182621	2.502	2.44059	0.986	0.404	WP_042877612.1
sid|182664	2.154	2.39563	0.987	0.412	WP_059818367.1
sid|182795	2.924	2.25513	0.99	0.439	WP_026140314.1
sid|183161	1.459	2.38592	0.983	0.412	KJS34782.1
sid|183201	2.296	2.40244	0.985	0.41	WP_089515094.1
sid|183587	1.732	1.85255	0.98	0.529	BAB62053.1
sid|183641	2.779	1.982	0.991	0.5	WP_059593647.1
sid|183797	1.477	1.83647	0.977	0.532	WP_046485877.1
sid|183912	1.046	1.78755	0.976	0.546	WP_096696846.1
sid|183970	0.258	1.58958	0.976	0.614	WP_086911023.1
sid|184097	0.345	1.61028	0.971	0.603	WP_079366525.1
sid|184292	1.516	1.50995	0.986	0.653	WP_014475143.1
sid|184628	0.835	1.86767	0.988	0.529	GAC18646.1
sid|184664	1.17	2.05462	0.978	0.476	WP_060246476.1
sid|185008	2.916	2.13508	0.98	0.459	ART39330.1
sid|185353	1.434	1.85199	0.976	0.527	WP_059692728.1
sid|185465	1.353	1.86312	0.98	0.526	WP_015005325.1
sid|19251	1.859	2.48111	0.985	0.397	WP_099419233.1
sid|40	0.43	2.05428	0.984	0.479	2D0D_A
sid|7928	0.965	2	0.986	0.493	WP_042301713.1
sid|8104	1.139	2.76816	0.991	0.358	WP_020394561.1

## Sheet: Table_S4 Activity_assay
Panel A		Specific activity (U g-1)											Panel B	ID enzyme	Nr of ester hydrolyzed
	Substrate	WP_101198885.1	WP_069226497.1	AJP48854.1	WP_042877612.1	WP_059541090.1	ART39858.1	WP_089515094.1	WP_026140314.1	PHR82761.1	WP_014900537.1			EH1A(72)	72	Prominent substrate promiscuity
meta-CLEAVAGE COMPOUNDS	2-Hydroxy-6-oxo-6-phenylhexa-2,4-dienoate (HOPHD)	23242.6	22802.8	325.287	683.647	479.221	477.129	369.073	560.58	518.472	401.924			EH2(71)	71
	2-Hydroxy-6-oxohepta-2,4-dienoate (HOHD)	8611.8	8925.58	89036	90254.1	89255.6	89255.6	89255.6	89663	89663	89255.6			EH3(69)	69
Ester compounds	1-Napthyl acetate	5229.7	5383.39	4009.29	5146.08	5699.79	4617.24	4829.68	4619.5	5342.71	833.724			CalB(68)	68
	1-Naphthyl butyrate	3000.19	4952.85	1015.88	0	5081.67	0	0	0	3314.33	28.4764			EH4(67)	67
	Glyceryl triacetate	5559.67	3941.49	3545.98	4194.61	2682.65	3851.09	2569.65	3527.9	5564.19	3.37749			EH5(67)	67
	Glyceryl tripropionate	2674.74	1644.17	4983.36	5121.22	6201.52	4779.96	3776.51	1566.2	5654.59	325.67			EH6(66)	66
	Glyceryl tributyrate	1819.57	630.957	1702.93	0	2848.77	1280.31	1235.11	0	2426.14	93.5652			EH7(64)	64
	Glyceryl trioctanoate	1152.61	276.097	0	0	6154.06	0	980.852	0	1830.62	0			EH8(63)	63
	Methyl 2-bromobutyrate	0	0	0	0	0	0	0	0	1522.13	0.0188336			EH9(61)	61
	Hexyl acetate	0	914.181	0	0	1124.36	0	0	0	1078.03	0			EH10(58)	58
	Octyl acetate	4482.77	5775.5	0	2984.37	4579.95	2453.26	2724.46	1431.73	5169.81	3.17346			EH11(53)	53
	Dodecanoyl acetate	1193.29	5573.23	0	0	2232.91	0	0	1243.02	1534.56	0			EH12(51)	51
	Pentadecyl acetate	0	4972.06	0	0	0	0	0	0	0	0			EH13(49)	49
	Ethyl propionate	1770.73	0	1128.88	0	1117.58	3147.09	0	0	1314.21	0			EH14(48)	48
	Ethyl butyrate	2670.22	1203.46	1187.64	0	1232.85	4112.12	0	0	1610.27	0			EH15(42)	42
	Ethyl hexanoate	2395.63	0	0	0	0	0	0	0	0	0.359407			EH16(42)	42
	Ethyl octanoate	0	1620.44	0	0	0	0	0	0	0	0			EH17(39)	39	High substrate promiscuity
	Ethyl decanoate	0	3834.14	0	0	1589.93	1024.92	1117.58	0	0	0			EH18(38)	38
	Ethyl dodecanoate	0	2846.5	0	0	1404.61	1137.92	0	0	0	0.043945			EH19(37)	37
	Ethyl myristate	0	1356.02	0	0	1177.47	1511.96	0	0	0	0			EH20(37)	37
	Ethyl benzoate	0	1410.26	0	0	946.952	1952.66	2101.83	0	1030.57	0			EH21(36)	36
	(1R)-Menthyl acetate	0	1680.33	0	0	1748.13	0	0	0	0	0			CalA(36)	36
	(1S)-Menthyl acetate	0	1674.68	0	0	3654.46	0	0	0	0	0			EH22(35)	35
	N-Benzyl-(S)-proline ethyl ester	0	0	0	0	0	1163.91	1229.46	0	0	0			EH23(34)	34
	N-Benzyl-(R)-proline ethyl ester	0	0	0	0	0	1218.15	1276.92	0	1073.51	0			EH24(34)	34
	Methyl (R)-mandelate	3030.7	1193.29	808	2230.65	0	0	0	2578.69	3577.62	3.66784			EH25(33)	33
	Methyl (S)-mandelate	4172.01	928.871	958.252	3254.44	0	0	0	3812.67	4294.05	212.217			EH26(32)	32
	Ethyl (R)-4-chloro-3-hydroxybutyrate	3426.2	2422.75	2027.24	3252.18	1812.54	1360.54	891	4043.19	4126.81	3.78555			EH27(32)	32
	Ethyl (S)-4-chloro-3-hydroxybutyrate	1883.73	5599.22	1644.17	2263.42	3524.51	2573.04	2127.82	1518	2500.72	3.74945			EH28(31)	31
	Ethyl (R)-Lactate	978.592	1909.72	304	540	2400.15	0	0	421	1141.31	0.838094			EH29(31)	31
	Ethyl (S)-lactate	2568.52	4604.81	378.679	3009.23	5106.53	0	0	1316.47	4123.42	3.51717			EH30(30)	30
	Methyl (S)-3-hydroxybutyrate	1296.13	3254.44	0	1033.96	905.141	0	1836.27	0	2451	1.98851			EH31(29)	29
	Methyl (R)-3-hydroxybutyrate	1412.43	5396.95	0	1527.63	1733.44	0	1692.96	0	1828.36	0.342143			EH32(29)	29
	(1R)-Neomenthyl acetate	0	1031.7	0	0	1097.24	0	0	0	0	0			EH33(29)	29
	(1S)-Neomenthyl acetate	0	982.841	0	0	1236.24	0	0	0	0	0			EH34(29)	29
	Propylparaben	0	2926.74	0	0	1227.2	0	2043.07	1068.99	0	0			EH35(29)	29
	Butylparaben	0	5869.29	0	0	0	1566.2	2054.37	1111.93	0	0			EH36(28)	28	Moderate substrate promiscuity
	Methyl 3-hydroxybenzoate	0	2256.64	0	0	0	2014.81	1942.49	1124.36	943.562	0			EH37(28)	28
	Methyl 2-hydroxybenzoate	0	1167.3	0	0	0	1917.63	1908.59	939.042	907.401	0			EH38(28)	28
	Phthalic acid diethyl ester	0	0	0	0	1039.61	1747	1814.8	971.812	0	0			EH39(28)	28
	Methyl (R)-3-hydroxyvalerate	2319.92	5841.04	1705.19	2238.56	3458.97	995.542	2135.8	2107.48	4640.97	3.85303			EH40(27)	27
	Methyl (S)-3-hydroxyvalerate	4411.57	2562.87	1979.78	4890.7	3518.94	2122.17	2558.35	4829.68	5179.98	3.6286			EH41(27)	27
	Benzyl (R)-2-hydroxy-3-phenylpropionate	0	6467.07	1653.21	0	5843.3	3373.09	2584.34	1601.23	1806.89	2.90194			EH42(27)	27
	Benzylparaben	0	5384.52	0	0	0	0	0	0	920.961	0			EH43(27)	27
	Methyl benzoate	0	1508.57	1006.84	1232.85	0	0	0	0	1761.69	0.610521			EH44(25)	25
	Methyl butyrate	0	0	925.481	0	0	0	0	0	1165.04	0			EH1B(24)	24
	Methyl decanoate	0	4237.55	0	0	0	0	0	0	0	0			EH45(24)	24
	Methyl oleate	0	1508.57	0	0	0	0	0	0	0	0			EH46(23)	23
	Methyl hexanoate	1437.38	0	0	0	1306.3	0	0	0	2501.85	0.0502228			EH47(23)	23
	Methyl octanoate	0	2082.62	0	0	0	1411.39	1065.6	0	0	0			EH48(23)	23
	Methyl dodecanoate	0	3084.94	0	0	1089.33	0	0	0	0	0			EH49(23)	23
	Methyl myristate	0	0	0	0	0	1088.2	0	1422.69	0	0			EH50(22)	22
	Propyl propionate	0	0	0	0	0	0	0	0	1205.72	0			EH51(22)	22
	Propyl butyrate	0	0	0	0	1127.75	0	0	0	1548.12	0			EH52(21)	21
	Propyl hexanoate	1191.03	1808.02	0	0	965.032	0	0	1521	1909.72	0			EH53(21)	21
	Phenylethyl cinnamate	0	3092.85	0	0	945.822	0	0	0	1291.61	0			EH54(21)	21
	Isobutyl cinnamate	0	5495.26	0	0	1971.87	0	0	0	905.141	0.111432			EH55(21)	21
	Methyl cinnamate	1457.72	6371.02	0	1337.94	1552.64	2165.11	2300.71	2149.29	3127.88	0			EH56(21)	21
	Methyl ferulate	1193.29	4879.4	0	1211.37	1023.79	1701.8	1014.75	1462.24	2836.33	0.238558			EH57(21)	21
	Vinyl acetate	1735.7	2501.85	0	1796.72	1023.79	2639.71	2516.54	2185.45	3936.97	0.720384			EH58(21)	21
	Vinyl propionate	0	1075.77	1140.18	0	0	2267.94	1844.18	0	3784.42	757.109			EH59(21)	21
	Vinyl butyrate	0	1024.92	1752.65	0	0	2219.35	1643.04	0	2805.82	135.828			EH60(21)	21
	Vinyl laurate	0	0	0	0	0	1396.7	0	0	0	0			EH61(20)	20
	Vinyl myristate	0	0	0	0	0	0	0	0	0	0			EH62(20)	20
	Vinyl palmitate	0	0	0	0	0	0	0	0	0	0.139682			EH63(20)	20
	Vinyl oleate	0	0	0	0	0	0	0	0	0	0.00941678			EH64(20)	20
	Vinyl benzoate	1113.06	3836.4	0	1558.29	3230.71	1635.13	3016.01	0	1504.05	4.16536			EH65(20)	20
	Vinyl crotonate	1184.25	0	0	0	1145.83	0	0	1019.27	2865.72	0.29192			EH66(19)	19
	Vinyl acrylate	0	0	0	0	1130.01	0	0	0	2253.25	0.102015			EH67(18)	18
	Geranyl acetate	3331.28	4235.29	0	2275.85	2926.74	1163.91	0	1672.42	3742.61	6.78008			EH68(18)	18
	3-Methyl-3-buten-1-yl acetate	0	0	0	0	1655.47	0	0	1101.76	1158.26	0.150669			EH69(18)	18
	Ethyl 2-ethylacetoacetate	1644.17	0	0	1506.31	1004.58	1327.77	1440.77	3486.09	3332.41	35.4824			EH70(18)	18
	Ethyl 2-methylacetoacetate	4972.06	971.812	1536.82	4739.28	1308.56	1181.99	1487.1	4043.19	4639.84	3.73689			EH71(18)	18
	Ethyl 3-oxohexanoate	5396.95	5808.27	3530.16	5417.29	3559.54	2630.67	3740.35	5937.09	5150.6	212.443			EH72(18)	18
	Ethyl acetoacetate	5442.15	5399.21	2063.41	4648.88	2829.55	1776.38	3884.99	5313.33	5288.47	78.423			EH73(17)	17
	Ethyl propionylacetate	5728.04	6430.91	4127.94	5215.01	2604.68	2706.38	3565.19	5291.86	5422.94	307.59			EH74(17)	17
	ϒ-Valerolactone	2874.76	2076.97	1256.58	1884.86	0	0	0	0	2797.91	2.4107			EH75(16)	16
	Methyl glycolate	1037.35	2804.69	0	0	0	0	0	0	0	3.69609			EH76(16)	16
	D-Pantolactone	0	1333.42	0	0	0	0	0	0	0	0			EH77(16)	16
	L-Pantolactone	1241.89	0	0	0	0	0	0	0	0	0			EH78(15)	15
	(1R)-Dimenthyl succinate	983.112	2235.17	0	0	0	0	0	0	0	0			EH79(14)	14
	Ethyl 2-chlorobenzoate	0	0	0	0	1446.42	2316.53	0	0	0	0			EH80(14)	14
	Cyclohexyl butyrate	0	1245.28	0	0	1525.52	985.372	0	0	1017.01	0.596396			EH81(14)	14
	n-Pentyl benzoate	0	1350.37	0	0	1137.92	0	0	0	0	0			EH82(14)	14
	Methyl (R)-Lactate	1375.23	1351.89	0	1036.22	0	0	0	1461.11	1363.93	3.82635			EH83(14)	14
	Methyl (S)-Lactate	2091.66	2534.62	0	1725.53	0	0	0	2369.64	1994.47	15.8202			EH84(13)	13
	Propyl acetate	2202.4	1700.67	0	1424.95	1343.59	1714.23	0	0	3766.34	1.15356			EH85(13)	13
	Butyl acetate	1992.21	1178.6	0	2541.4	1002.32	0	0	0	4385.58	1.06724			EH86(13)	13
	Phenyl acetate	5868.16	5723.52	4616.11	5725.78	3917.76	5474.92	2948.21	5630.86	5497.52	1271.04			EH87(13)	13
	Phenyl propionate	6151.8	5720.13	4617.24	6047.83	3462.36	5584.53	4621.76	4938.16	5921.27	3.96917			EH88(13)	13
	Glucose pentaacetate	1040.74	3985.56	0	0	3590.05	0	0	0	0	1.01			EH89(13)	13
	TOTAL ESTERS CONVERTED	45	68	27	32	57	42	36	36	59	49			EH90(13)	13
														EH91(13)	13
														EH92(12)	12
														EH93(12)	12
														EH94(12)	12
														EH95(11)	11
														EH96(11)	11
														EH97(11)	11
														EH98(11)	11
														EH99(11)	11
														EH100(11)	11
														EH101(11)	11
														EH102(10)	10
														EH103(10)	10
														EH104(10)	10
														EH105(10)	10
														EH106(9)	9	Specific enzymes
														EH107(9)	9
														EH108(9)	9
														EH109(9)	9
														EH110(8)	8
														EH111(8)	8
														EH112(8)	8
														EH113(8)	8
														EH114(8)	8
														EH115(8)	8
														EH116(7)	7
														EH117(6)	6
														EH118(6)	6
														EH119(6)	6
														EH120(5)	5
														EH121(5)	5
														EH122(5)	5
														EH123(4)	4
														EH124(4)	4
														EH125(4)	4
														EH126(4)	4
														EH127(4)	4
														EH128(4)	4
														EH129(3)	3
														EH130(2)	2
														EH131(2)	2
														EH132(2)	2
														EH133(2)	2
														EH134(2)	2
														EH135(2)	2
														EH136(2)	2
														EH137(2)	2
														EH138(2)	2
														EH139(2)	2
														EH140(1)	1
														EH141(1)	1
														EH142(1)	1
														EH143(1)	1
														EH144(1)	1
														EH145(1)	1
														WP_101198885.1	45
														WP_069226497.1	68
														AJP48854.1	27
														WP_042877612.1	32
														WP_059541090.1	57
														ART39858.1	42
														WP_089515094.1	36
														WP_026140314.1	36
														PHR82761.1	59
														WP_014900537.1	49

## Sheet: Sequences and ID
	ID	NCBI Reference Sequence	Sequence	Full description
sid|181416	mCPHPsp	WP_101198885.1	MTVIKNPEIGQIINVKGVKTNVHDIGSGPPVMLIHGSGPGVTAWANWRLAMPELAKSHRVIAPDMLGFGFTARPANNLCNLERWISHTIDLLDELGIERIDLIGNSFGGGIALALAIRFPHRVRSLVLMGSVGVPFKLTPGLNAVWGYEPSLQAMKGLLDIFAYDRNLVTNELAELRYQASIRPGFQEAFSAMFPAPRQRWVDALESKEHDIRALSHDTLILHGREDEIIPLQTSQTLFEWLPKAQLHMFGHCGHWTQIEHATRFSKLVVDFLAEDETN	sid|181416|pid|181416|hfid|40|sfid|5|gb|WP_101198885.1|taxonID|2058332|Paraglaciecolasp.MB-3u-78-AD*12
sid|176070	mCPHBd1	WP_069226497.1	MSANPELGRRIVAGGLDTNYHDLGDGPPVLLIHGSGPGVTAYANWRLTMPALAGQFRVIAPDMAGFGETERPRDYVYSMDHWVDHALGLLDALGVERAHVIGNSFGGALALALAIRAPDRVGRLVLMGAAGTRFALTEGLDAVWGYTPSIANMRALLDIFAFDRTLVNDELAKLRYDASVRPGYQEAFANMFPAPRQRWVDALASDEAKLRALPHDTLIVHGREDRVIPLDSSMRLLELLPNAQLHVFGRCGHWTQIEHAARFNRLVIEHFNE	sid|176070|pid|173763|hfid|40|sfid|5|gb|WP_069226497.1|taxonID|488732|Burkholderiadiffusa-AD*12
sid|178198	mCPHRa	AJP48854.1	MSSNPEIGLSIVANGIATNYHDQGSGDPVLMIHGSGPGVTAFANWRLSMPVLAKNFRVIAPDMVGFGYTERPAGIKYSMENWVSHALGLLDALKIERAHIVGNSFGGGLALALAIRAPERVNRLVLMGAAGTSFKLTQGLDDVWGYTPSFENMRKIMDIFAYDRSLVSDELAKLRYEASIRPGYQEAFSSMFPAPRQRWVDALASREEDVRALPHDTLIIHGREDQVLPLSASLKLFELISKSQLHVFGQCGHWTQIEHAERFTKLVGDFFLESSS	sid|178198|pid|178198|hfid|40|sfid|5|gb|AJP48854.1|taxonID|1565605|Rugosibacteraromaticivorans-AD*11
sid|182621	mCPHCn	WP_042877612.1	MQTNPETGRRIAANGIETNYHDLGDGHPVLLIHGSGPGVTAYANWRLTMPALAQQFRVIAPDMAGFGETERPAGYRYSMDNWVAHALGLLDALDIERAHVVGNSFGGALALALAIRAPERVGKLVLMGSAGMKFPLTEGLDAVWGYTPSIGNMRALLDIFAFDRTLVNDDLAKLRYEASIRPGYQEAFANMFPAPRQRWVDALASDEARIRALPHDTLIVHGRDDRVIPLASSLKLLELVPKSQLHAFGECGHWTQIEHAERFNRLVIGHFSESAAGLVSG	sid|182621|pid|182621|hfid|40|sfid|5|gb|WP_042877612.1|taxonID|106590|Cupriavidusnecator-AD*11
sid|171139	mCPHBd2	WP_059541090.1	MSANPELGRRIVAGGLDTNYHDLGDGPPVLLIHGSGPGVTAYANWRLTMPALAGQFRVIAPDMAGFGETERPRDYVYSMDHWVDHALGLLDALGVERAHVIGNSFGGALALALAIRAPDRVGRLVLMGAAGTRFTLTEGLDAVWGYTPSIANMRVLLDIFAFDRTLVNDELAKLRYDASVRPGYQEAFANMFPAPRQRWVDALASDEAKLRALPHDTLIVHGREDRVIPLDSSMRLLELLPNAQLHVFGRCGHWTQIEHAARFNRLVIEHFNE	sid|171139|pid|173763|hfid|40|sfid|5|gb|WP_059541090.1|taxonID|488732|Burkholderiadiffusa-AD*11
sid|181104	mCPHUb	ART39858.1	MGSNPEIGLSIAANGINTNYHDQGSGEPVLMIHGSGPGVTAFANWRLTMPVLAKNFRVIAPDMAGFGYTERPPGAQYSMSNWVDHALGLLDALKIESTHIVGNSFGGGLALALAIRAPERVKRLVLMGAAGTSFPLTQGLDDVWGYTPSFENMRKMMDIFAYNRNLVSDELAQLRYEASIRPGYQESFASMFPAPRQRWVDALASREEDVRALPHETLLIHGREDKVIPLSASHKLFELIPNAQLHVFGHCGHWTQIEHAGRFGRLVTDFFLES	sid|181104|pid|171087|hfid|40|sfid|5|gb|ART39858.1|taxonID|77133|unculturedbacterium-AD*10
sid|183201	mCPHPc	WP_089515094.1	MSNTAVNNPEIGKSIIAGGIKTNYQDHGQGDPIFLIHGSGPGVTAYANWRLTMPVLAEKFRVIAPDMVGFGFTERPANVSYTMDMWVSHALSLMDELKIEKAHLVGNSFGGGLALALALKAPDRVNRLVLMGAAGTKFQLTDGLDAVWGYKGTLEHMKELVGLFAFNKNLVSDDLAKLRYEASIRPGFQEAFSAMFPAPRQRWVDSLASDEGKIKTLTHETMIIHGRDDAIIPLSASLRLHDLIPKSQLHVFGQCGHWTQIEHSARFNQLLLNFFLEANAK	sid|183201|pid|183201|hfid|40|sfid|5|gb|WP_089515094.1|taxonID|351345|Polynucleobactercosmopolitanus-AD*8
sid|182795	mCPHPv	WP_026140314.1	MANPEIGKSIVAAGIQTNYHDLGEGTPVLLVHGSGPGVSAYANWRLTMPALSKNFRVIAADIVGFGFTHRPENYNYSMDNWVKHIIGVMDALEIEKAHIVGNSFGGALAIAIAIRHPGRIDRMVLMGAAGTQFELTNGLDAVWGYTPSIKNMRDLLDIFAYDRSLVSDELARLRYEASIQPGFQESFSRMFPAPRQRWVAALASSDADIKGLSNETLIIHGREDQVVPLSSSLRLVELIERAQLHVFGRCGHWTQIEQADRFNRLVVEFFDEASVLSHK	sid|182795|pid|182795|hfid|40|sfid|5|gb|WP_026140314.1|taxonID|76761|Pseudomonasveronii-AD*7
sid|12870	mCPHCsp	PHR82761.1	MTSNPEIGKSIKANGIKTNYHDVGKGDAVLLIHGSGPGVSAWANWRLNIPELAKSHRVIAPDMVGFGYTERPTDNQYSMDGWVEQVIGLLDALNIDKASVVGNSFGGGLALAIAIRYPERVNKLVLMGSVGVSFDLTEGLDKVWGYQPSIANMKQLLDIFAYNRELVSDELAELRYKASIQEGFQESFSSMFPAPRQRWIEAMQSSAEYIQHIEHKTLIIHGRDDKVIPLDNAYKLIELIKHAQLHVYSECGHWIQIEKKEEFNQLVSNFLQTSLEHNYEN	sid|12870|pid|12870|hfid|40|sfid|5|gb|PHR82761.1|taxonID|56799|Colwelliasp.-AD*4
sid|180273	mCPHBc	WP_014900537.1	MSTNPELGRRIIAGGLDTNYHDLGDGPPVLLIHGSGPGVTAYANWRLTMPALATQFRVIAPDMAGFGETERPRGYAYSMDNWVDHALGLLDALGVERAHVIGNSFGGALALALAIRAPDRVGRLVLMGAAGTRFTLTEGLDAVWGYTPSIANMRGLLDIFAFDRTLVNDDLAKLRYDASVRPGYQEAFANMFPAPRQRWVDALASDDAKLRALTHDTLIVHGREDRVIPLESSTKLLELLPNAQLHVFGRCGHWTQIEHAARFNRLVIEHFNE	sid|180273|pid|176456|hfid|40|sfid|5|gb|WP_014900537.1|taxonID|292|Burkholderiacepacia-AD*12
